# Supplementary material for: Astronomical component estimation (ACE v.1) by time-variant sinusoidalmodeling
Source: Copernicus journal article supplement (doi:10.5194/gmd-9-3517-2016), 2016-09-30
Supplement: Supplementary file 1 [file gmd-9-3517-2016-supplement.zip]

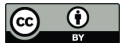

## *Supplement of*

# **Astronomical component estimation (ACE v.1) by time-variant sinusoidal modeling**

**Matthias Sinnesael et al.**

*Correspondence to:* Matthias Sinnesael (masinnes@vub.ac.be)

- [gmd-9-3517-2016-supplement-title-page.pdf](#)
- [ACEv1\\_MAINSCRIPT.m](#)
- [Manual\\_ACEv1\\_Model\\_Sinnesael\\_et\\_al\\_2016\\_GMD.txt](#)
- [OrbitalComponentEstimation.m](#)
- [SedimentationRateEstimation.m](#)
- [UncertaintyAnalysis.m](#)

The copyright of individual parts of the supplement might differ from the CC-BY 3.0 licence.
